# Supplementary material
Source: PubMed Central journal article supplement (PMC7965986)
Supplement: 2610_tables.pdf [file 2610_tables.pdf]

**On-line Table 1: Comparison of variables between local control and failure in the prospective study (n = 17)**

| Variable                                                                 |                    | Local Control  | Local Failure  | P               |
|--------------------------------------------------------------------------|--------------------|----------------|----------------|-----------------|
| Age (yr)                                                                 |                    | 66.1 ± 5.08    | 64.4 ± 4.00    | NS <sup>a</sup> |
| Tumor volume before treatment (mm <sup>3</sup> )                         |                    | 6736 ± 1623    | 9930 ± 1825    | NS              |
| Tumor volume at early-phase treatment (mm <sup>3</sup> )                 |                    | 5681 ± 1943    | 8240 ± 1697    | NS              |
| Volume reduction ratio                                                   |                    | 0.217 ± 0.084  | 0.174 ± 0.108  | NS              |
| Dose (Gy)                                                                |                    | 67.4 ± 0.79    | 66.3 ± 0.71    | NS              |
| Overall treatment time (days)                                            |                    | 60.8 ± 3.84    | 65.3 ± 5.04    | NS              |
| T2-before treatment (ms)                                                 |                    | 90.8 ± 4.69    | 84.1 ± 2.54    | NS              |
| T2-at early-phase treatment (ms)                                         |                    | 86.9 ± 5.15    | 83.8 ± 2.60    | NS              |
| T2 increase ratio                                                        |                    | -0.028 ± 0.030 | -0.018 ± 0.019 | NS              |
| Low ADC before treatment (×10 <sup>-3</sup> mm <sup>2</sup> /s)          |                    | 1.48 ± 0.150   | 1.50 ± 0.205   | NS              |
| Low ADC at early-phase treatment (×10 <sup>-3</sup> mm <sup>2</sup> /s)  |                    | 1.88 ± 0.181   | 1.90 ± 0.216   | NS              |
| Low ADC increase ratio                                                   |                    | 0.392 ± 0.208  | 0.330 ± 0.142  | NS              |
| High ADC before treatment (×10 <sup>-3</sup> mm <sup>2</sup> /s)         |                    | 0.731 ± 0.047  | 1.046 ± 0.086  | .0049           |
| High ADC at early-phase treatment (×10 <sup>-3</sup> mm <sup>2</sup> /s) |                    | 1.015 ± 0.092  | 1.036 ± 0.058  | NS              |
| High ADC increase ratio                                                  |                    | 0.395 ± 0.102  | 0.019 ± 0.078  | .0116           |
| Location                                                                 | Hypopharynx        | 4              | 4              | NS              |
|                                                                          | Other              | 5              | 4              |                 |
| T stage                                                                  | T 12               | 5              | 2              | NS              |
|                                                                          | T 34               | 4              | 6              |                 |
| N stage                                                                  | N 01               | 2              | 3              | NS              |
|                                                                          | N 23               | 7              | 5              |                 |
| Treatment method                                                         | Chemoradiotherapy  | 9              | 4              | .0294           |
|                                                                          | Radiotherapy alone | 0              | 4              |                 |

**Note:**—Data are shown as means ± SEs.  
<sup>a</sup> NS indicates  $P \geq .05$ .

**On-line Table 2: Comparison of variables between local control and failure in the validation study (n = 40)**

| Variable                                                         |                    | Local Control | Local Failure | P               |
|------------------------------------------------------------------|--------------------|---------------|---------------|-----------------|
| Age (yr)                                                         |                    | 65.2 ± 2.06   | 63.8 ± 2.97   | NS <sup>a</sup> |
| Tumor volume before treatment (mm <sup>3</sup> )                 |                    | 7457 ± 1295   | 13506 ± 2371  | .0196           |
| Dose (Gy)                                                        |                    | 66.5 ± 0.37   | 66.6 ± 0.54   | NS              |
| Overall treatment time (days)                                    |                    | 65.8 ± 2.29   | 65.3 ± 3.70   | NS              |
| Low ADC before treatment (×10 <sup>-3</sup> mm <sup>2</sup> /s)  |                    | 1.670 ± 0.114 | 1.412 ± 0.136 | NS              |
| High ADC before treatment (×10 <sup>-3</sup> mm <sup>2</sup> /s) |                    | 0.713 ± 0.021 | 1.006 ± 0.058 | .0002           |
| Location                                                         | Hypopharynx        | 12            | 7             | NS              |
|                                                                  | Other              | 15            | 6             |                 |
| T stage                                                          | T 12               | 19            | 2             | .0019           |
|                                                                  | T 34               | 8             | 11            |                 |
| N stage                                                          | N 01               | 9             | 5             | NS              |
|                                                                  | N 23               | 18            | 8             |                 |
| Treatment method                                                 | Chemoradiotherapy  | 27            | 8             | .002            |
|                                                                  | Radiotherapy alone | 0             | 5             |                 |

**Note:**—Data are shown as means ± SEs.  
<sup>a</sup> NS indicates  $P \geq .05$ .
